# Supplementary material for: Metamorphism and P-T Evolution of High-Pressure Granulites from the Fuping Complex, North China Craton
Source: MDPI journal article supplement (doi:10.3390/min14020138), 2024-01-26
Supplement: s1 [file s1]

## Supplementary Table 6

**Table S6.** Selected microprobe analyses for plagioclase of high-pressure granulites in this study.

| Lithology                      | garnet pyroxenite    |       |       |       |       |           |       |       |       |       | garnet two-pyroxene granulite |       |       |       |       |           |       |       |       |       | garnet-bearing-plagioclase amphibolite |       |       |       |       |       |
|--------------------------------|----------------------|-------|-------|-------|-------|-----------|-------|-------|-------|-------|-------------------------------|-------|-------|-------|-------|-----------|-------|-------|-------|-------|----------------------------------------|-------|-------|-------|-------|-------|
| Point                          | “White eye” strucure |       |       |       |       | In matrix |       |       |       |       | “White eye” strucure          |       |       |       |       | In matrix |       |       |       |       | In matrix                              |       |       |       |       |       |
| SiO <sub>2</sub>               | 57.76                | 57.08 | 56.93 | 56.17 | 57.87 | 56.45     | 56.14 | 56.19 | 56.27 | 56.60 | 53.46                         | 54.37 | 56.02 | 57.96 | 57.58 | 55.52     | 56.77 | 56.59 | 55.58 | 51.57 | 55.45                                  | 53.30 | 55.99 | 56.91 | 58.79 | 55.46 |
| Al <sub>2</sub> O <sub>3</sub> | 26.99                | 27.25 | 27.16 | 27.92 | 26.93 | 27.58     | 27.62 | 27.85 | 27.75 | 28.03 | 29.22                         | 29.72 | 28.16 | 26.65 | 27.35 | 28.37     | 27.48 | 27.66 | 28.46 | 31.29 | 28.87                                  | 29.78 | 28.02 | 27.45 | 25.72 | 28.26 |
| MgO                            | 0.00                 | 0.00  | 0.00  | 0.00  | 0.00  | 0.01      | 0.00  | 0.01  | 0.01  | 0.00  | 0.00                          | 0.00  | 0.00  | 0.00  | 0.00  | 0.00      | 0.00  | 0.00  | 0.00  | 0.01  | 0.00                                   | 0.01  | 0.00  | 0.00  | 0.00  | 0.00  |
| CaO                            | 8.19                 | 8.37  | 8.31  | 8.75  | 8.19  | 8.61      | 8.61  | 8.88  | 8.55  | 9.25  | 10.48                         | 10.96 | 9.39  | 7.99  | 8.54  | 9.41      | 8.61  | 8.48  | 9.56  | 13.19 | 10.01                                  | 11.07 | 9.00  | 8.50  | 6.85  | 9.49  |
| Na <sub>2</sub> O              | 6.57                 | 6.43  | 6.53  | 6.15  | 6.30  | 6.18      | 6.25  | 6.10  | 6.27  | 6.13  | 5.42                          | 5.16  | 6.32  | 6.70  | 6.81  | 5.56      | 6.46  | 6.35  | 5.79  | 3.94  | 5.74                                   | 5.11  | 6.18  | 6.47  | 7.40  | 5.89  |
| K <sub>2</sub> O               | 0.38                 | 0.39  | 0.48  | 0.38  | 0.49  | 0.37      | 0.40  | 0.34  | 0.41  | 0.27  | 0.19                          | 0.16  | 0.21  | 0.38  | 0.44  | 0.27      | 0.23  | 0.31  | 0.25  | 0.13  | 0.17                                   | 0.18  | 0.22  | 0.20  | 0.40  | 0.23  |
| P <sub>2</sub> O <sub>5</sub>  | 0.00                 | 0.04  | 0.03  | 0.00  | 0.00  | 0.00      | 0.00  | 0.01  | 0.00  | 0.00  | 0.04                          | 0.03  | 0.00  | 0.00  | 0.00  | 0.02      | 0.02  | 0.00  | 0.02  | 0.01  | 0.03                                   | 0.03  | 0.01  | 0.00  | 0.01  | 0.05  |
| Si                             | 10.35                | 10.27 | 10.27 | 10.14 | 10.37 | 10.20     | 10.17 | 10.14 | 10.17 | 10.13 | 9.77                          | 9.77  | 10.05 | 10.39 | 10.26 | 10.05     | 10.22 | 10.20 | 10.02 | 9.35  | 9.95                                   | 9.68  | 10.11 | 10.24 | 10.58 | 10.03 |
| Al                             | 5.70                 | 5.78  | 5.77  | 5.94  | 5.69  | 5.87      | 5.90  | 5.93  | 5.91  | 5.91  | 6.29                          | 6.29  | 5.95  | 5.63  | 5.74  | 6.05      | 5.83  | 5.88  | 6.05  | 6.69  | 6.11                                   | 6.38  | 5.96  | 5.82  | 5.46  | 6.02  |
| Ca                             | 1.57                 | 1.61  | 1.61  | 1.69  | 1.57  | 1.67      | 1.67  | 1.72  | 1.65  | 1.77  | 2.05                          | 2.11  | 1.80  | 1.54  | 1.63  | 1.82      | 1.66  | 1.64  | 1.85  | 2.56  | 1.93                                   | 2.15  | 1.74  | 1.64  | 1.32  | 1.84  |
| Na                             | 2.28                 | 2.24  | 2.28  | 2.15  | 2.19  | 2.16      | 2.19  | 2.13  | 2.20  | 2.13  | 1.92                          | 1.80  | 2.20  | 2.33  | 2.35  | 1.95      | 2.25  | 2.22  | 2.02  | 1.38  | 2.00                                   | 1.80  | 2.16  | 2.26  | 2.58  | 2.07  |
| K                              | 0.09                 | 0.09  | 0.11  | 0.09  | 0.11  | 0.09      | 0.09  | 0.08  | 0.09  | 0.06  | 0.04                          | 0.04  | 0.05  | 0.09  | 0.10  | 0.06      | 0.05  | 0.07  | 0.06  | 0.03  | 0.04                                   | 0.04  | 0.05  | 0.05  | 0.09  | 0.05  |
| An                             | 39.87                | 40.88 | 40.12 | 43.04 | 40.61 | 42.57     | 42.22 | 43.72 | 41.94 | 44.76 | 51.09                         | 53.50 | 44.54 | 38.86 | 39.94 | 47.55     | 41.86 | 41.71 | 47.03 | 64.44 | 48.59                                  | 53.96 | 44.03 | 41.56 | 33.09 | 46.47 |
| Ab                             | 57.92                | 56.85 | 57.09 | 54.75 | 56.48 | 55.26     | 55.45 | 54.32 | 55.66 | 53.69 | 47.81                         | 45.58 | 54.25 | 58.96 | 57.63 | 50.86     | 56.83 | 56.51 | 51.53 | 34.81 | 50.41                                  | 45.02 | 54.70 | 57.27 | 64.63 | 52.19 |
| Or                             | 2.22                 | 2.26  | 2.78  | 2.20  | 2.91  | 2.17      | 2.33  | 1.96  | 2.40  | 1.55  | 1.10                          | 0.92  | 1.21  | 2.19  | 2.44  | 1.59      | 1.31  | 1.79  | 1.43  | 0.75  | 1.00                                   | 1.03  | 1.27  | 1.17  | 2.28  | 1.34  |
