# Supplementary material for: Metamorphism and P-T Evolution of High-Pressure Granulites from the Fuping Complex, North China Craton
Source: MDPI journal article supplement (doi:10.3390/min14020138), 2024-01-26
Supplement: s1 [file s1]

### Supplementary Table 3

**Table S3.** Selected microprobe analyses for garnet of high-pressure granulites in this study.

| Lithology                      |       |       | garnet pyroxenite |       |       |       |       |       |       |       |       |        |       |       |       |       |       |       |       |       |  |
|--------------------------------|-------|-------|-------------------|-------|-------|-------|-------|-------|-------|-------|-------|--------|-------|-------|-------|-------|-------|-------|-------|-------|--|
| Point                          | Rim   |       | Mantle            |       |       |       |       |       | Core  |       |       | Mantle |       |       |       | Rim   |       |       |       |       |  |
| SiO <sub>2</sub>               | 37.69 | 37.37 | 38.51             | 38.56 | 36.89 | 38.78 | 37.13 | 36.95 | 37.75 | 38.03 | 37.90 | 38.06  | 41.73 | 38.42 | 38.07 | 38.06 | 38.40 | 37.95 | 38.38 | 37.23 |  |
| TiO <sub>2</sub>               | 0.07  | 0.13  | 0.13              | 0.05  | 0.11  | 0.09  | 0.07  | 0.04  | 0.03  | 0.06  | 0.05  | 0.05   | 0.06  | 0.10  | 0.08  | 0.08  | 0.06  | 0.03  | 0.10  | 0.10  |  |
| Al <sub>2</sub> O <sub>3</sub> | 21.71 | 20.89 | 21.64             | 21.66 | 21.65 | 21.73 | 21.40 | 21.58 | 21.16 | 20.90 | 20.78 | 21.51  | 18.83 | 20.84 | 21.12 | 21.17 | 21.15 | 21.74 | 21.12 | 21.12 |  |
| Cr <sub>2</sub> O <sub>3</sub> | 0.00  | 0.03  | 0.04              | 0.03  | 0.02  | 0.01  | 0.06  | 0.06  | 0.02  | 0.03  | 0.01  | 0.04   | 0.00  | 0.03  | 0.00  | 0.03  | 0.01  | 0.00  | 0.05  | 0.01  |  |
| FeO                            | 26.75 | 25.76 | 24.85             | 24.40 | 24.66 | 24.76 | 25.27 | 25.24 | 24.94 | 25.03 | 25.67 | 25.85  | 23.98 | 24.95 | 24.61 | 24.78 | 24.73 | 25.40 | 25.16 | 25.79 |  |
| MnO                            | 0.77  | 0.52  | 0.57              | 0.66  | 0.63  | 0.67  | 0.70  | 0.70  | 0.69  | 0.65  | 0.71  | 0.73   | 0.67  | 0.77  | 0.76  | 0.74  | 0.73  | 0.67  | 0.71  | 0.75  |  |
| MgO                            | 4.34  | 4.27  | 3.85              | 3.62  | 3.59  | 3.74  | 3.81  | 3.82  | 3.93  | 3.88  | 3.88  | 3.77   | 3.48  | 3.59  | 3.60  | 3.56  | 3.64  | 3.72  | 4.11  | 4.02  |  |
| CaO                            | 7.92  | 9.47  | 10.80             | 11.09 | 10.85 | 10.24 | 9.86  | 9.98  | 10.09 | 10.05 | 9.46  | 9.52   | 9.59  | 10.64 | 10.67 | 10.58 | 10.43 | 10.41 | 9.65  | 9.09  |  |
| Na <sub>2</sub> O              | 0.00  | 0.01  | 0.01              | 0.00  | 0.06  | 0.00  | 0.00  | 0.00  | 0.01  | 0.00  | 0.01  | 0.00   | 0.01  | 0.00  | 0.01  | 0.01  | 0.00  | 0.01  | 0.01  | 0.04  |  |
| K <sub>2</sub> O               | 0.00  | 0.01  | 0.00              | 0.00  | 0.00  | 0.00  | 0.00  | 0.00  | 0.00  | 0.00  | 0.00  | 0.00   | 0.00  | 0.00  | 0.00  | 0.00  | 0.00  | 0.00  | 0.01  | 0.01  |  |
| ZnO                            | 0.04  | 0.00  | 0.00              | 0.05  | 0.00  | 0.02  | 0.06  | 0.06  | 0.03  | 0.00  | 0.03  | 0.00   | 0.00  | 0.00  | 0.05  | 0.04  | 0.02  | 0.00  | 0.02  | 0.00  |  |
| P <sub>2</sub> O <sub>5</sub>  | 0.01  | 0.01  | 0.00              | 0.03  | 0.01  | 0.03  | 0.00  | 0.00  | 0.01  | 0.00  | 0.00  | 0.00   | 0.00  | 0.02  | 0.00  | 0.00  | 0.00  | 0.03  | 0.01  | 0.00  |  |
| X <sub>Fe</sub>                | 0.78  | 0.77  | 0.78              | 0.79  | 0.79  | 0.79  | 0.79  | 0.79  | 0.78  | 0.78  | 0.79  | 0.79   | 0.79  | 0.80  | 0.79  | 0.80  | 0.79  | 0.79  | 0.77  | 0.78  |  |
| Py                             | 17.04 | 16.53 | 14.89             | 14.11 | 14.03 | 14.75 | 14.97 | 14.97 | 15.38 | 15.22 | 15.22 | 14.76  | 14.36 | 13.97 | 14.12 | 13.95 | 14.33 | 14.40 | 16.08 | 15.79 |  |
| Alm                            | 58.92 | 55.97 | 53.87             | 53.36 | 54.07 | 54.75 | 55.64 | 55.41 | 54.74 | 55.03 | 56.50 | 56.80  | 55.59 | 54.53 | 54.13 | 54.55 | 54.55 | 55.15 | 55.22 | 56.86 |  |
| Gro                            | 22.34 | 26.36 | 29.98             | 31.07 | 30.49 | 29.01 | 27.83 | 28.08 | 28.36 | 28.31 | 26.69 | 26.80  | 28.47 | 29.80 | 30.06 | 29.84 | 29.49 | 28.96 | 27.13 | 25.67 |  |
| Sp                             | 1.71  | 1.13  | 1.25              | 1.46  | 1.41  | 1.49  | 1.55  | 1.55  | 1.52  | 1.45  | 1.59  | 1.63   | 1.58  | 1.69  | 1.68  | 1.65  | 1.62  | 1.48  | 1.57  | 1.67  |  |

| Lithology                      | garnet pyroxenite |       |       |       | garnet two-pyroxene granulite            |       |       |       |       | garnet-bearing-plagioclase amphibolite |       |       |  |
|--------------------------------|-------------------|-------|-------|-------|------------------------------------------|-------|-------|-------|-------|----------------------------------------|-------|-------|--|
| Point                          | Relic fine grains |       |       |       | Mentle section of garnet with inclusions |       |       |       |       | Relic fine grains in matrix            |       |       |  |
| SiO <sub>2</sub>               | 37.91             | 38.11 | 37.62 | 37.51 | 38.19                                    | 36.99 | 37.59 | 37.40 | 37.21 | 38.16                                  | 37.73 | 37.64 |  |
| TiO <sub>2</sub>               | 0.06              | 0.03  | 0.07  | 0.05  | 0.08                                     | 0.06  | 0.00  | 0.03  | 0.05  | 0.00                                   | 0.02  | 0.07  |  |
| Al <sub>2</sub> O <sub>3</sub> | 21.60             | 21.68 | 21.72 | 21.65 | 21.82                                    | 21.58 | 21.77 | 21.70 | 21.43 | 21.73                                  | 21.38 | 21.73 |  |
| Cr <sub>2</sub> O <sub>3</sub> | 0.01              | 0.05  | 0.00  | 0.00  | 0.02                                     | 0.04  | 0.01  | 0.00  | 0.01  | 0.03                                   | 0.03  | 0.00  |  |
| FeO                            | 27.76             | 25.97 | 25.36 | 24.52 | 26.31                                    | 24.91 | 26.51 | 26.42 | 27.13 | 26.44                                  | 25.81 | 24.43 |  |
| MnO                            | 0.75              | 0.53  | 0.54  | 2.07  | 1.31                                     | 0.79  | 1.24  | 1.32  | 1.28  | 2.63                                   | 2.34  | 2.78  |  |
| MgO                            | 4.13              | 4.01  | 3.89  | 3.33  | 5.14                                     | 3.39  | 3.73  | 3.80  | 3.04  | 4.46                                   | 4.07  | 3.68  |  |
| CaO                            | 7.87              | 9.56  | 10.18 | 9.61  | 6.79                                     | 10.42 | 9.96  | 9.66  | 9.80  | 6.57                                   | 7.72  | 8.92  |  |
| Na <sub>2</sub> O              | 0.00              | 0.02  | 0.01  | 0.00  | 0.01                                     | 0.01  | 0.04  | 0.00  | 0.02  | 0.00                                   | 0.02  | 0.00  |  |

|                               |       |       |       |       |       |       |       |       |       |       |       |       |
|-------------------------------|-------|-------|-------|-------|-------|-------|-------|-------|-------|-------|-------|-------|
| K <sub>2</sub> O              | 0.00  | 0.01  | 0.01  | 0.01  | 0.00  | 0.00  | 0.01  | 0.00  | 0.01  | 0.00  | 0.00  | 0.00  |
| ZnO                           | 0.05  | 0.00  | 0.00  | 0.03  | 0.00  | 0.00  | 0.00  | 0.00  | 0.00  | 0.00  | 0.04  | 0.10  |
| P <sub>2</sub> O <sub>5</sub> | 0.02  | 0.01  | 0.00  | 0.03  | 0.00  | 0.00  | 0.00  | 0.00  | 0.00  | 0.02  | 0.03  | 0.00  |
| X <sub>Fe</sub>               | 0.79  | 0.78  | 0.79  | 0.81  | 0.74  | 0.80  | 0.80  | 0.80  | 0.83  | 0.77  | 0.78  | 0.79  |
| Py                            | 16.03 | 15.58 | 15.12 | 13.22 | 20.14 | 13.40 | 14.11 | 14.43 | 11.69 | 17.49 | 16.00 | 14.50 |
| Alm                           | 60.39 | 56.58 | 55.26 | 54.67 | 57.82 | 55.23 | 56.17 | 56.33 | 58.46 | 58.14 | 56.96 | 54.01 |
| Gro                           | 21.92 | 26.67 | 28.43 | 27.45 | 19.11 | 29.59 | 27.05 | 26.38 | 27.05 | 18.51 | 21.82 | 25.27 |
| Sp                            | 1.66  | 1.17  | 1.19  | 4.67  | 2.92  | 1.78  | 2.66  | 2.85  | 2.80  | 5.86  | 5.22  | 6.22  |
