# Supplementary material for: Metamorphism and P-T Evolution of High-Pressure Granulites from the Fuping Complex, North China Craton
Source: MDPI journal article supplement (doi:10.3390/min14020138), 2024-01-26
Supplement: s1 [file s1]

## Supplementary Table 2

**Table S2.** Trace and rare earth elements (ppm) compositions of the representative high-pressure granulites analyzed in the present study.

| Sample               | Lg-0-01           | Lg-0-2 | Lg-1-1 | Lg-1-2 | Lg-1-3                        | Lg-1-5 | Lg-1-6 | Lg-2-1 | Lg-6-1                                 | Lg-6-2 | Lg-6-04 |
|----------------------|-------------------|--------|--------|--------|-------------------------------|--------|--------|--------|----------------------------------------|--------|---------|
| Lithology            | garnet pyroxenite |        |        |        | garnet two-pyroxene granulite |        |        |        | garnet-bearing-plagioclase amphibolite |        |         |
| La                   | 21.00             | 19.99  | 13.39  | 8.37   | 9.92                          | 10.46  | 12.39  | 12.39  | 17.20                                  | 17.02  | 16.80   |
| Ce                   | 47.20             | 45.90  | 28.07  | 19.68  | 22.66                         | 24.07  | 29.20  | 26.05  | 37.10                                  | 38.05  | 35.60   |
| Pr                   | 7.00              | 7.19   | 4.31   | 3.22   | 3.73                          | 4.16   | 4.82   | 4.62   | 5.70                                   | 5.85   | 4.90    |
| Nd                   | 27.40             | 28.40  | 17.37  | 14.13  | 15.91                         | 17.97  | 20.46  | 19.34  | 22.69                                  | 23.22  | 18.40   |
| Sm                   | 5.60              | 6.82   | 4.92   | 4.78   | 4.35                          | 4.80   | 5.20   | 5.00   | 5.43                                   | 5.64   | 4.30    |
| Eu                   | 1.80              | 2.16   | 1.76   | 1.74   | 1.52                          | 1.74   | 1.71   | 1.75   | 1.63                                   | 1.73   | 1.50    |
| Gd                   | 5.20              | 7.46   | 6.97   | 6.67   | 5.34                          | 5.07   | 5.48   | 5.07   | 5.53                                   | 5.81   | 4.80    |
| Tb                   | 0.90              | 1.60   | 1.69   | 1.62   | 1.24                          | 1.05   | 1.14   | 1.04   | 1.12                                   | 1.18   | 1.10    |
| Dy                   | 5.80              | 11.31  | 12.49  | 11.67  | 9.09                          | 7.46   | 8.12   | 7.46   | 7.92                                   | 8.21   | 7.60    |
| Ho                   | 1.10              | 2.32   | 2.53   | 2.29   | 1.85                          | 1.53   | 1.67   | 1.55   | 1.63                                   | 1.69   | 1.60    |
| Er                   | 3.30              | 6.81   | 7.30   | 6.58   | 5.39                          | 4.51   | 4.89   | 4.60   | 4.83                                   | 5.02   | 4.70    |
| Tm                   | 0.50              | 1.13   | 1.20   | 1.08   | 0.90                          | 0.74   | 0.81   | 0.77   | 0.80                                   | 0.83   | 0.80    |
| Yb                   | 3.40              | 7.23   | 7.57   | 6.91   | 5.76                          | 4.82   | 5.22   | 4.90   | 5.16                                   | 5.38   | 5.10    |
| Lu                   | 1.10              | 1.23   | 1.27   | 1.16   | 0.98                          | 0.82   | 0.89   | 0.84   | 0.88                                   | 0.92   | 0.80    |
| Y                    | 29.10             | 58.03  | 62.90  | 56.84  | 45.63                         | 37.03  | 40.92  | 38.18  | 40.13                                  | 41.41  | 41.00   |
| REE                  | 131.30            | 149.55 | 110.85 | 89.89  | 88.64                         | 89.21  | 102.00 | 95.37  | 117.63                                 | 120.56 | 108.00  |
| LREE                 | 110.00            | 110.47 | 69.82  | 51.92  | 58.09                         | 63.20  | 73.77  | 69.14  | 89.75                                  | 91.51  | 81.50   |
| HREE                 | 21.30             | 39.08  | 41.02  | 37.97  | 30.54                         | 26.01  | 28.23  | 26.23  | 27.87                                  | 29.05  | 26.50   |
| LREE/HREE            | 5.16              | 2.83   | 1.70   | 1.37   | 1.90                          | 2.43   | 2.61   | 2.64   | 3.22                                   | 3.15   | 3.08    |
| δEu                  | 1.00              | 0.92   | 0.92   | 0.94   | 0.96                          | 1.07   | 0.97   | 1.05   | 0.90                                   | 0.92   | 1.01    |
| (La/Yb) <sub>N</sub> | 4.16              | 1.86   | 1.19   | 0.82   | 1.16                          | 1.46   | 1.60   | 1.70   | 2.25                                   | 2.13   | 2.22    |
| (La/Sm) <sub>N</sub> | 67.74             | 64.49  | 43.18  | 26.99  | 31.99                         | 33.73  | 39.95  | 39.96  | 55.49                                  | 54.92  | 54.19   |
| Rb                   | 20.70             | 44.90  | 10.84  | 7.41   | 9.05                          | 6.76   | 7.20   | 9.38   | 21.57                                  | 26.89  | 40.20   |
| Ba                   | 152.50            | 331.10 | 86.01  | 83.08  | 41.13                         | 55.55  | 42.55  | 41.96  | 233.43                                 | 232.35 | 207.00  |
| Th                   | 1.50              | 2.20   | 1.62   | 1.33   | 1.04                          | 0.97   | 1.16   | 1.97   | 2.05                                   | 2.24   | 3.70    |
| U                    | 1.00              | 0.50   | 1.69   | 2.54   | 0.92                          | 0.54   | 0.45   | 1.32   | 0.66                                   | 0.61   | 1.20    |
| Ta                   | 0.50              | 0.40   | 1.61   | 3.07   | 0.58                          | 0.42   | 0.44   | 0.51   | 0.46                                   | 0.49   | 0.90    |
| Nb                   | 8.50              | 6.90   | 13.73  | 24.24  | 7.52                          | 5.69   | 6.11   | 6.01   | 6.42                                   | 6.74   | 11.10   |
| La                   | 21.00             | 19.99  | 13.39  | 8.37   | 9.92                          | 10.46  | 12.39  | 12.39  | 17.20                                  | 17.02  | 16.80   |
| Ce                   | 47.20             | 45.90  | 28.07  | 19.68  | 22.66                         | 24.07  | 29.20  | 26.05  | 37.10                                  | 38.05  | 35.60   |
| Sr                   | 370.60            | 283.60 | 34.63  | 34.39  | 73.27                         | 109.23 | 61.73  | 86.06  | 186.44                                 | 145.65 | 192.70  |
| Nd                   | 27.40             | 28.40  | 17.37  | 14.13  | 15.91                         | 17.97  | 20.46  | 19.34  | 22.69                                  | 23.22  | 18.40   |
| Hf                   | 1.60              | 2.40   | 3.19   | 4.11   | 2.80                          | 2.25   | 2.07   | 2.40   | 2.69                                   | 2.83   | 3.10    |
| Zr                   | 91.30             | 145.40 | 111.10 | 145.07 | 94.21                         | 72.74  | 64.76  | 78.60  | 85.74                                  | 90.30  | 193.80  |
| Sm                   | 5.60              | 6.82   | 4.92   | 4.78   | 4.35                          | 4.80   | 5.20   | 5.00   | 5.43                                   | 5.64   | 4.30    |
| Tb                   | 0.90              | 1.60   | 1.69   | 1.62   | 1.24                          | 1.05   | 1.14   | 1.04   | 1.12                                   | 1.18   | 1.10    |
| Y                    | 29.10             | 58.03  | 62.90  | 56.84  | 45.63                         | 37.03  | 40.92  | 38.18  | 40.13                                  | 41.41  | 41.00   |
