# Supplementary material for: Metamorphism and P-T Evolution of High-Pressure Granulites from the Fuping Complex, North China Craton
Source: MDPI journal article supplement (doi:10.3390/min14020138), 2024-01-26
Supplement: s1 [file s1]

Supplementary Table 7

Table S7. Pb isotopic analyses for representative zircons of high-pressure granulites.

| Sample<br>Point | Th/U  | Isotope ratio                        |         |                                     |         |                                     |         |                                      |         | Age (Ma)                             |    |                                     |    |                                     |    |                                      |     |
|-----------------|-------|--------------------------------------|---------|-------------------------------------|---------|-------------------------------------|---------|--------------------------------------|---------|--------------------------------------|----|-------------------------------------|----|-------------------------------------|----|--------------------------------------|-----|
|                 |       | <sup>207</sup> Pb/ <sup>206</sup> Pb | 1σ      | <sup>207</sup> Pb/ <sup>235</sup> U | 1σ      | <sup>206</sup> Pb/ <sup>238</sup> U | 1σ      | <sup>208</sup> Pb/ <sup>232</sup> Th | 1σ      | <sup>207</sup> Pb/ <sup>206</sup> Pb | 1σ | <sup>207</sup> Pb/ <sup>235</sup> U | 1σ | <sup>206</sup> Pb/ <sup>238</sup> U | 1σ | <sup>208</sup> Pb/ <sup>232</sup> Th | 1σ  |
| Lg-0-01         |       |                                      |         |                                     |         |                                     |         |                                      |         |                                      |    |                                     |    |                                     |    |                                      |     |
| Lg-0-01-01      | 0.005 | 0.11109                              | 0.00444 | 5.11531                             | 0.20508 | 0.33411                             | 0.0097  | 0.06875                              | 0.03181 | 1817                                 | 35 | 1839                                | 34 | 1858                                | 47 | 1344                                 | 602 |
| Lg-0-01-02      | 0.008 | 0.11255                              | 0.00594 | 4.80647                             | 0.24791 | 0.30989                             | 0.01023 | 0.14637                              | 0.04945 | 1841                                 | 48 | 1786                                | 43 | 1740                                | 50 | 2761                                 | 872 |
| Lg-0-01-03      | 0.007 | 0.11189                              | 0.0045  | 4.99049                             | 0.20106 | 0.32363                             | 0.0094  | 0.09499                              | 0.02964 | 1830                                 | 35 | 1818                                | 34 | 1807                                | 46 | 1834                                 | 547 |
| Lg-0-01-04      | 0.007 | 0.11097                              | 0.00479 | 4.91801                             | 0.21111 | 0.32158                             | 0.00961 | 0.13927                              | 0.03907 | 1815                                 | 38 | 1805                                | 36 | 1797                                | 47 | 2635                                 | 693 |
| Lg-0-01-05      | 0.006 | 0.11304                              | 0.00393 | 5.26201                             | 0.1865  | 0.33779                             | 0.00931 | 0.10755                              | 0.03227 | 1849                                 | 30 | 1863                                | 30 | 1876                                | 45 | 2065                                 | 589 |
| Lg-0-01-06      | 0.013 | 0.11172                              | 0.00458 | 4.98299                             | 0.20434 | 0.32369                             | 0.00946 | 0.04601                              | 0.01523 | 1828                                 | 36 | 1816                                | 35 | 1808                                | 46 | 909                                  | 294 |
| Lg-0-01-07      | 0.007 | 0.11124                              | 0.00395 | 4.54711                             | 0.16369 | 0.29665                             | 0.00817 | 0.04555                              | 0.01678 | 1820                                 | 31 | 1740                                | 30 | 1675                                | 41 | 900                                  | 324 |
| Lg-0-01-08      | 0.014 | 0.11109                              | 0.00402 | 4.48437                             | 0.16467 | 0.29347                             | 0.00813 | 0.09442                              | 0.01753 | 1814                                 | 31 | 1728                                | 30 | 1659                                | 41 | 1824                                 | 324 |
| Lg-0-01-10      | 0.006 | 0.11129                              | 0.00441 | 4.85419                             | 0.19284 | 0.31657                             | 0.00909 | 0.09853                              | 0.03348 | 1821                                 | 35 | 1794                                | 33 | 1773                                | 45 | 1899                                 | 616 |
| Lg-0-01-11      | 0.009 | 0.11166                              | 0.0043  | 4.61914                             | 0.17879 | 0.30027                             | 0.0085  | 0.08512                              | 0.02211 | 1827                                 | 34 | 1753                                | 32 | 1693                                | 42 | 1651                                 | 412 |
| Lg-0-01-13      | 0.011 | 0.11205                              | 0.00329 | 4.66215                             | 0.14307 | 0.30203                             | 0.00783 | 0.07294                              | 0.01289 | 1833                                 | 25 | 1760                                | 26 | 1701                                | 39 | 1423                                 | 243 |
| Lg-0-01-15      | 0.008 | 0.11113                              | 0.00437 | 5.20168                             | 0.20546 | 0.33925                             | 0.0097  | 0.07701                              | 0.02534 | 1821                                 | 34 | 1853                                | 34 | 1883                                | 47 | 1500                                 | 476 |
| Lg-0-01-16      | 0.012 | 0.11111                              | 0.00518 | 4.85269                             | 0.22377 | 0.31706                             | 0.00973 | 0.093                                | 0.02565 | 1818                                 | 42 | 1794                                | 39 | 1775                                | 48 | 1797                                 | 474 |

---

|            |       |         |         |         |         |         |         |         |         |      |    |      |    |      |    |      |     |
|------------|-------|---------|---------|---------|---------|---------|---------|---------|---------|------|----|------|----|------|----|------|-----|
| Lg-0-01-17 | 0.013 | 0.11302 | 0.0034  | 4.74856 | 0.14889 | 0.30502 | 0.00795 | 0.08838 | 0.01336 | 1849 | 26 | 1776 | 26 | 1716 | 39 | 1712 | 248 |
| Lg-0-01-18 | 0.011 | 0.11392 | 0.00323 | 4.85043 | 0.14502 | 0.30912 | 0.00794 | 0.08064 | 0.01272 | 1863 | 24 | 1794 | 25 | 1736 | 39 | 1568 | 238 |
| Lg-0-01-19 | 0.008 | 0.113   | 0.00362 | 5.16594 | 0.17109 | 0.33192 | 0.00882 | 0.0622  | 0.01588 | 1848 | 27 | 1847 | 28 | 1848 | 43 | 1220 | 302 |
| Lg-0-01-20 | 0.003 | 0.11144 | 0.00356 | 4.78952 | 0.15833 | 0.31207 | 0.00826 | 0.0988  | 0.03323 | 1823 | 27 | 1783 | 28 | 1751 | 41 | 1904 | 611 |
| Lg-0-01-21 | 0.010 | 0.11322 | 0.00391 | 4.97626 | 0.17549 | 0.31914 | 0.00867 | 0.06001 | 0.01619 | 1852 | 30 | 1815 | 30 | 1786 | 42 | 1178 | 309 |
| Lg-0-01-22 | 0.004 | 0.11182 | 0.00447 | 4.58979 | 0.18411 | 0.29805 | 0.00851 | 0.0981  | 0.04023 | 1829 | 35 | 1747 | 33 | 1682 | 42 | 1891 | 740 |
| Lg-0-01-23 | 0.006 | 0.11152 | 0.00328 | 4.52    | 0.1393  | 0.29433 | 0.00759 | 0.07904 | 0.01787 | 1824 | 25 | 1735 | 26 | 1663 | 38 | 1538 | 335 |
| Lg-0-01-24 | 0.011 | 0.11399 | 0.00342 | 4.98172 | 0.1561  | 0.31739 | 0.00825 | 0.08642 | 0.01426 | 1864 | 26 | 1816 | 26 | 1777 | 40 | 1675 | 265 |
| Lg-0-01-25 | 0.004 | 0.11125 | 0.00379 | 4.6204  | 0.1613  | 0.30162 | 0.00812 | 0.08238 | 0.03006 | 1820 | 29 | 1753 | 29 | 1699 | 40 | 1600 | 561 |
| Lg-0-01-27 | 0.004 | 0.11251 | 0.00296 | 4.83136 | 0.13625 | 0.31191 | 0.00782 | 0.07856 | 0.01908 | 1840 | 23 | 1790 | 24 | 1750 | 38 | 1529 | 358 |
| Lg-0-01-28 | 0.002 | 0.11169 | 0.00377 | 4.60515 | 0.15939 | 0.29949 | 0.00802 | 0.04654 | 0.02572 | 1827 | 29 | 1750 | 29 | 1689 | 40 | 919  | 497 |
| Lg-0-01-29 | 0.005 | 0.11217 | 0.00348 | 5.30557 | 0.17136 | 0.34357 | 0.00899 | 0.13265 | 0.0304  | 1835 | 27 | 1870 | 28 | 1904 | 43 | 2518 | 542 |
| Lg-0-01-30 | 0.021 | 0.11084 | 0.00416 | 5.04306 | 0.19197 | 0.33051 | 0.00919 | 0.07087 | 0.01297 | 1813 | 33 | 1827 | 32 | 1841 | 45 | 1384 | 245 |
| Lg-0-01-31 | 0.008 | 0.11206 | 0.00361 | 5.00229 | 0.16689 | 0.32431 | 0.00856 | 0.08296 | 0.01895 | 1833 | 28 | 1820 | 28 | 1811 | 42 | 1611 | 354 |
| Lg-0-01-32 | 0.004 | 0.11302 | 0.00285 | 5.23165 | 0.14312 | 0.33632 | 0.00833 | 0.11561 | 0.0192  | 1849 | 22 | 1858 | 23 | 1869 | 40 | 2211 | 348 |
| Lg-0-01-34 | 0.007 | 0.11361 | 0.0028  | 5.05378 | 0.13579 | 0.32323 | 0.00796 | 0.07531 | 0.01117 | 1858 | 22 | 1828 | 23 | 1805 | 39 | 1468 | 210 |
| Lg-0-01-36 | 0.070 | 0.11292 | 0.00549 | 5.12687 | 0.24666 | 0.32993 | 0.01024 | 0.0904  | 0.01126 | 1847 | 45 | 1841 | 41 | 1838 | 50 | 1749 | 209 |
| Lg-0-01-37 | 0.008 | 0.1131  | 0.0027  | 4.83234 | 0.12664 | 0.31051 | 0.00758 | 0.07297 | 0.00858 | 1850 | 21 | 1791 | 22 | 1743 | 37 | 1424 | 162 |

|            |       |         |         |         |         |         |         |         |         |      |    |      |    |      |    |      |     |
|------------|-------|---------|---------|---------|---------|---------|---------|---------|---------|------|----|------|----|------|----|------|-----|
| Lg-0-01-40 | 0.009 | 0.11237 | 0.0025  | 4.97162 | 0.12377 | 0.32159 | 0.00773 | 0.07246 | 0.00636 | 1838 | 20 | 1815 | 21 | 1797 | 38 | 1414 | 120 |
| Lg-1-04    |       |         |         |         |         |         |         |         |         |      |    |      |    |      |    |      |     |
| Lg-1-04-01 | 0.003 | 0.11054 | 0.00262 | 5.32631 | 0.14552 | 0.34951 | 0.00889 | 0.11892 | 0.02066 | 1808 | 22 | 1873 | 23 | 1932 | 42 | 2271 | 373 |
| Lg-1-04-02 | 0.004 | 0.11112 | 0.0027  | 5.01932 | 0.13954 | 0.3274  | 0.00836 | 0.08766 | 0.01736 | 1819 | 23 | 1823 | 24 | 1826 | 41 | 1698 | 323 |
| Lg-1-04-03 | 0.004 | 0.11294 | 0.00273 | 5.01363 | 0.13891 | 0.322   | 0.00822 | 0.12161 | 0.01832 | 1847 | 22 | 1822 | 23 | 1799 | 40 | 2320 | 330 |
| Lg-1-04-04 | 0.004 | 0.11404 | 0.00262 | 5.45643 | 0.14603 | 0.34707 | 0.00879 | 0.10208 | 0.01672 | 1865 | 22 | 1894 | 23 | 1921 | 42 | 1965 | 307 |
| Lg-1-04-05 | 0.003 | 0.11211 | 0.00295 | 5.36916 | 0.15822 | 0.34738 | 0.00903 | 0.03528 | 0.03542 | 1834 | 24 | 1880 | 25 | 1922 | 43 | 701  | 692 |
| Lg-1-04-06 | 0.005 | 0.11115 | 0.00251 | 5.3448  | 0.14133 | 0.3477  | 0.00878 | 0.12497 | 0.01496 | 1824 | 22 | 1876 | 23 | 1924 | 42 | 2380 | 269 |
| Lg-1-04-07 | 0.006 | 0.11176 | 0.00268 | 5.28877 | 0.14599 | 0.34328 | 0.00877 | 0.16703 | 0.01816 | 1828 | 22 | 1867 | 24 | 1902 | 42 | 3122 | 315 |
| Lg-1-04-08 | 0.007 | 0.11174 | 0.0027  | 5.26202 | 0.14617 | 0.3416  | 0.00874 | 0.20945 | 0.02093 | 1828 | 22 | 1863 | 24 | 1894 | 42 | 3844 | 350 |
| Lg-1-04-09 | 0.005 | 0.11031 | 0.00241 | 5.00873 | 0.13025 | 0.32936 | 0.00829 | 0.07244 | 0.01084 | 1805 | 21 | 1821 | 22 | 1835 | 40 | 1414 | 204 |
| Lg-1-04-10 | 0.006 | 0.11101 | 0.0025  | 5.19706 | 0.13796 | 0.3396  | 0.00859 | 0.09465 | 0.01132 | 1816 | 22 | 1852 | 23 | 1885 | 41 | 1828 | 209 |
| Lg-1-04-11 | 0.006 | 0.11314 | 0.00262 | 5.32014 | 0.14394 | 0.34111 | 0.00868 | 0.09033 | 0.01317 | 1850 | 22 | 1872 | 23 | 1892 | 42 | 1748 | 244 |
| Lg-1-04-12 | 0.005 | 0.10812 | 0.00266 | 5.09917 | 0.14399 | 0.3421  | 0.00879 | 0.07582 | 0.0145  | 1768 | 23 | 1836 | 24 | 1897 | 42 | 1477 | 272 |
| Lg-1-04-13 | 0.069 | 0.11232 | 0.00261 | 5.25067 | 0.14253 | 0.33912 | 0.00864 | 0.0903  | 0.00388 | 1837 | 22 | 1861 | 23 | 1882 | 42 | 1747 | 72  |
| Lg-1-04-14 | 0.004 | 0.1168  | 0.00291 | 5.48389 | 0.1559  | 0.34059 | 0.00879 | 0.09417 | 0.02286 | 1908 | 23 | 1898 | 24 | 1890 | 42 | 1819 | 422 |
| Lg-1-04-15 | 0.005 | 0.11202 | 0.00263 | 5.30651 | 0.1452  | 0.34364 | 0.00877 | 0.08434 | 0.01375 | 1832 | 22 | 1870 | 23 | 1904 | 42 | 1637 | 256 |
| Lg-1-04-16 | 0.017 | 0.1133  | 0.00321 | 5.31264 | 0.16637 | 0.34014 | 0.00903 | 0.08656 | 0.01135 | 1853 | 25 | 1871 | 27 | 1887 | 43 | 1678 | 211 |

---

|            |       |         |         |         |         |         |         |         |         |      |    |      |    |      |    |       |      |
|------------|-------|---------|---------|---------|---------|---------|---------|---------|---------|------|----|------|----|------|----|-------|------|
| Lg-1-04-18 | 0.004 | 0.11322 | 0.00274 | 5.30854 | 0.14866 | 0.34012 | 0.00875 | 0.08806 | 0.01884 | 1852 | 23 | 1870 | 24 | 1887 | 42 | 1706  | 350  |
| Lg-1-04-19 | 0.006 | 0.11391 | 0.00275 | 5.30675 | 0.14837 | 0.33794 | 0.00869 | 0.10756 | 0.01554 | 1863 | 23 | 1870 | 24 | 1877 | 42 | 2065  | 284  |
| Lg-1-04-20 | 0.006 | 0.11404 | 0.00286 | 5.23574 | 0.15014 | 0.33303 | 0.00862 | 0.10064 | 0.01604 | 1865 | 23 | 1858 | 24 | 1853 | 42 | 1938  | 295  |
| Lg-1-04-21 | 0.002 | 0.112   | 0.00289 | 5.12587 | 0.1504  | 0.33198 | 0.00865 | 0.13664 | 0.05865 | 1832 | 24 | 1840 | 25 | 1848 | 42 | 2589  | 1043 |
| Lg-1-04-22 | 0.007 | 0.11382 | 0.00271 | 5.24959 | 0.14552 | 0.33456 | 0.00859 | 0.09144 | 0.01259 | 1861 | 22 | 1861 | 24 | 1860 | 41 | 1769  | 233  |
| Lg-1-04-23 | 0.003 | 0.11344 | 0.0027  | 5.19732 | 0.14413 | 0.33232 | 0.00853 | 0.11004 | 0.02139 | 1855 | 22 | 1852 | 24 | 1850 | 41 | 2110  | 389  |
| Lg-1-04-24 | 0.003 | 0.11609 | 0.00282 | 5.6143  | 0.15808 | 0.35079 | 0.00905 | 0.19076 | 0.03145 | 1897 | 23 | 1918 | 24 | 1938 | 43 | 3529  | 534  |
| Lg-1-04-25 | 0.004 | 0.11371 | 0.00304 | 5.46785 | 0.16461 | 0.34881 | 0.00917 | 0.14698 | 0.02748 | 1860 | 24 | 1896 | 26 | 1929 | 44 | 2772  | 484  |
| Lg-1-04-26 | 0.003 | 0.11332 | 0.00286 | 5.35008 | 0.15499 | 0.34245 | 0.00891 | 0.12614 | 0.02875 | 1853 | 23 | 1877 | 25 | 1898 | 43 | 2401  | 516  |
| Lg-1-04-27 | 0.003 | 0.11371 | 0.00277 | 5.3043  | 0.1501  | 0.33836 | 0.00875 | 0.11419 | 0.02313 | 1860 | 23 | 1870 | 24 | 1879 | 42 | 2186  | 420  |
| Lg-1-04-28 | 0.004 | 0.11502 | 0.00301 | 5.59977 | 0.16629 | 0.35313 | 0.00925 | 0.08863 | 0.0204  | 1880 | 24 | 1916 | 26 | 1950 | 44 | 1716  | 379  |
| Lg-1-04-29 | 0.005 | 0.11201 | 0.00329 | 5.45067 | 0.17631 | 0.35296 | 0.00948 | 0.12593 | 0.02888 | 1832 | 26 | 1893 | 28 | 1949 | 45 | 2397  | 518  |
| Lg-1-04-30 | 0.006 | 0.11577 | 0.0033  | 5.65383 | 0.17881 | 0.35424 | 0.00947 | 0.14758 | 0.02835 | 1892 | 26 | 1924 | 27 | 1955 | 45 | 2782  | 499  |
| Lg-1-04-31 | 0.004 | 0.11532 | 0.00301 | 5.62043 | 0.16713 | 0.35352 | 0.00928 | 0.16471 | 0.03164 | 1885 | 24 | 1919 | 26 | 1951 | 44 | 3082  | 549  |
| Lg-1-04-32 | 0.003 | 0.11258 | 0.00547 | 5.5501  | 0.27291 | 0.35756 | 0.0114  | 0.22127 | 0.1329  | 1841 | 46 | 1908 | 42 | 1971 | 54 | 4040  | 2200 |
| Lg-1-04-33 | 0.003 | 0.11477 | 0.00324 | 5.72851 | 0.18033 | 0.362   | 0.00967 | 0.02256 | 0.05475 | 1876 | 25 | 1936 | 27 | 1992 | 46 | 451   | 1082 |
| Lg-1-04-34 | 0.001 | 0.11481 | 0.00555 | 5.63505 | 0.27554 | 0.356   | 0.01138 | 1.11864 | 0.60878 | 1877 | 45 | 1921 | 42 | 1963 | 54 | 15175 | 5808 |
| Lg-1-04-35 | 0.004 | 0.1115  | 0.00363 | 5.56504 | 0.19556 | 0.36198 | 0.01001 | 0.06962 | 0.03278 | 1824 | 29 | 1911 | 30 | 1992 | 47 | 1360  | 619  |

|            |       |         |         |         |         |         |         |         |         |      |    |      |    |      |    |      |     |
|------------|-------|---------|---------|---------|---------|---------|---------|---------|---------|------|----|------|----|------|----|------|-----|
| Lg-1-04-36 | 0.004 | 0.11283 | 0.00296 | 5.52351 | 0.16541 | 0.35506 | 0.00934 | 0.12575 | 0.03046 | 1845 | 24 | 1904 | 26 | 1959 | 44 | 2394 | 547 |
| Lg-1-04-38 | 0.004 | 0.11639 | 0.00324 | 5.62806 | 0.17582 | 0.35071 | 0.00936 | 0.08596 | 0.03258 | 1902 | 25 | 1920 | 27 | 1938 | 45 | 1667 | 606 |
| Lg-1-04-39 | 0.004 | 0.11541 | 0.00289 | 5.57064 | 0.1618  | 0.35006 | 0.00914 | 0.084   | 0.02097 | 1886 | 23 | 1912 | 25 | 1935 | 44 | 1630 | 391 |
| Lg-1-04-40 | 0.004 | 0.11329 | 0.00271 | 5.24485 | 0.14759 | 0.33574 | 0.00869 | 0.10798 | 0.01793 | 1853 | 23 | 1860 | 24 | 1866 | 42 | 2073 | 327 |
| Lg-6-4     |       |         |         |         |         |         |         |         |         |      |    |      |    |      |    |      |     |
| Lg-6-4-01  | 0.006 | 0.11331 | 0.00293 | 5.15795 | 0.15215 | 0.33022 | 0.00862 | 0.09527 | 0.01586 | 1853 | 24 | 1846 | 25 | 1839 | 42 | 1839 | 293 |
| Lg-6-4-02  | 0.007 | 0.11361 | 0.00309 | 5.37197 | 0.1641  | 0.34303 | 0.00904 | 0.07234 | 0.01871 | 1858 | 25 | 1880 | 26 | 1901 | 43 | 1412 | 353 |
| Lg-6-4-03  | 0.006 | 0.11344 | 0.00309 | 5.31343 | 0.16246 | 0.33978 | 0.00896 | 0.1109  | 0.02223 | 1855 | 25 | 1871 | 26 | 1886 | 43 | 2126 | 404 |
| Lg-6-4-04  | 0.007 | 0.11266 | 0.00299 | 5.15536 | 0.15473 | 0.33196 | 0.00869 | 0.09265 | 0.01752 | 1843 | 24 | 1845 | 26 | 1848 | 42 | 1791 | 324 |
| Lg-6-4-05  | 0.006 | 0.11293 | 0.00324 | 5.29486 | 0.16789 | 0.34011 | 0.00905 | 0.12386 | 0.02255 | 1847 | 26 | 1868 | 27 | 1887 | 44 | 2360 | 406 |
| Lg-6-4-06  | 0.005 | 0.11308 | 0.00289 | 5.23334 | 0.15242 | 0.33573 | 0.00871 | 0.10697 | 0.02378 | 1849 | 23 | 1858 | 25 | 1866 | 42 | 2054 | 434 |
| Lg-6-4-07  | 0.007 | 0.11344 | 0.00295 | 5.23546 | 0.15433 | 0.33478 | 0.00871 | 0.07981 | 0.01498 | 1855 | 24 | 1858 | 25 | 1862 | 42 | 1552 | 280 |
| Lg-6-4-08  | 0.005 | 0.11335 | 0.00349 | 5.18353 | 0.17312 | 0.33171 | 0.00896 | 0.04992 | 0.02421 | 1854 | 28 | 1850 | 28 | 1847 | 43 | 985  | 466 |
| Lg-6-4-09  | 0.008 | 0.11304 | 0.00314 | 5.25961 | 0.16264 | 0.3375  | 0.00889 | 0.11779 | 0.01788 | 1849 | 25 | 1862 | 26 | 1875 | 43 | 2251 | 323 |
| Lg-6-4-10  | 0.007 | 0.11462 | 0.00317 | 5.36159 | 0.16512 | 0.33932 | 0.00894 | 0.08449 | 0.02075 | 1874 | 25 | 1879 | 26 | 1883 | 43 | 1639 | 387 |
| Lg-6-4-11  | 0.006 | 0.11402 | 0.00293 | 5.27025 | 0.15375 | 0.33529 | 0.00868 | 0.0826  | 0.01886 | 1864 | 23 | 1864 | 25 | 1864 | 42 | 1604 | 352 |
| Lg-6-4-12  | 0.007 | 0.11271 | 0.00451 | 5.32234 | 0.21981 | 0.34252 | 0.01002 | 0.11058 | 0.03737 | 1844 | 36 | 1872 | 35 | 1899 | 48 | 2120 | 680 |
| Lg-6-4-13  | 0.007 | 0.11343 | 0.00349 | 5.39674 | 0.18008 | 0.3451  | 0.0093  | 0.15294 | 0.03144 | 1855 | 27 | 1884 | 29 | 1911 | 45 | 2877 | 551 |

|           |       |         |         |         |         |         |         |         |         |      |    |      |    |      |    |      |     |
|-----------|-------|---------|---------|---------|---------|---------|---------|---------|---------|------|----|------|----|------|----|------|-----|
| Lg-6-4-14 | 0.006 | 0.11291 | 0.00331 | 5.30085 | 0.17004 | 0.34053 | 0.00905 | 0.14992 | 0.03206 | 1847 | 26 | 1869 | 27 | 1889 | 44 | 2823 | 564 |
| Lg-6-4-15 | 0.009 | 0.11301 | 0.00422 | 5.43772 | 0.21168 | 0.34903 | 0.00996 | 0.14466 | 0.03199 | 1848 | 34 | 1891 | 33 | 1930 | 48 | 2731 | 565 |
| Lg-6-4-17 | 0.005 | 0.11298 | 0.00326 | 5.33458 | 0.16901 | 0.34248 | 0.00905 | 0.13616 | 0.03295 | 1848 | 26 | 1874 | 27 | 1899 | 43 | 2580 | 586 |
| Lg-6-4-18 | 0.005 | 0.11303 | 0.00377 | 5.26653 | 0.18681 | 0.33796 | 0.00928 | 0.07634 | 0.03486 | 1849 | 30 | 1863 | 30 | 1877 | 45 | 1487 | 655 |
| Lg-6-4-19 | 0.007 | 0.11311 | 0.00399 | 5.41371 | 0.20074 | 0.34716 | 0.00969 | 0.11384 | 0.03526 | 1850 | 32 | 1887 | 32 | 1921 | 46 | 2179 | 640 |
| Lg-6-4-20 | 0.006 | 0.11336 | 0.00437 | 5.21153 | 0.20821 | 0.33346 | 0.00958 | 0.11645 | 0.03716 | 1854 | 35 | 1855 | 34 | 1855 | 46 | 2226 | 673 |
| Lg-6-4-21 | 0.004 | 0.11362 | 0.00331 | 5.63112 | 0.17945 | 0.35946 | 0.00951 | 0.18737 | 0.03921 | 1858 | 26 | 1921 | 27 | 1980 | 45 | 3471 | 667 |
| Lg-6-4-23 | 0.005 | 0.11299 | 0.0041  | 5.70601 | 0.21677 | 0.36627 | 0.01032 | 0.14009 | 0.04824 | 1848 | 33 | 1932 | 33 | 2012 | 49 | 2650 | 855 |
| Lg-6-4-25 | 0.005 | 0.11341 | 0.00441 | 5.406   | 0.21706 | 0.34572 | 0.00995 | 0.09344 | 0.04738 | 1855 | 35 | 1886 | 34 | 1914 | 48 | 1806 | 876 |
| Lg-6-4-27 | 0.007 | 0.11264 | 0.00425 | 5.25511 | 0.20578 | 0.33836 | 0.0096  | 0.0937  | 0.03244 | 1842 | 34 | 1862 | 33 | 1879 | 46 | 1810 | 600 |
| Lg-6-4-29 | 0.005 | 0.11331 | 0.00467 | 5.4034  | 0.22808 | 0.34584 | 0.01016 | 0.12067 | 0.05231 | 1853 | 38 | 1885 | 36 | 1915 | 49 | 2303 | 943 |
| Lg-6-4-31 | 0.006 | 0.11323 | 0.00364 | 5.32016 | 0.18209 | 0.34074 | 0.00917 | 0.07916 | 0.02945 | 1852 | 29 | 1872 | 29 | 1890 | 44 | 1540 | 552 |
| Lg-6-4-33 | 0.006 | 0.11371 | 0.00486 | 5.22469 | 0.2269  | 0.33322 | 0.00989 | 0.16409 | 0.04911 | 1860 | 39 | 1857 | 37 | 1854 | 48 | 3071 | 853 |
| Lg-6-4-34 | 0.006 | 0.11294 | 0.00357 | 5.31451 | 0.17939 | 0.34124 | 0.00913 | 0.11349 | 0.03832 | 1847 | 28 | 1871 | 29 | 1893 | 44 | 2173 | 696 |
| Lg-6-4-35 | 0.006 | 0.1132  | 0.00414 | 5.31913 | 0.20216 | 0.34077 | 0.00952 | 0.18511 | 0.05129 | 1851 | 33 | 1872 | 32 | 1890 | 46 | 3433 | 875 |
| Lg-6-4-36 | 0.005 | 0.11357 | 0.00376 | 5.59208 | 0.19589 | 0.35707 | 0.00968 | 0.14465 | 0.04709 | 1857 | 29 | 1915 | 30 | 1968 | 46 | 2731 | 832 |
| Lg-6-4-37 | 0.007 | 0.11324 | 0.00354 | 5.04672 | 0.16855 | 0.32318 | 0.0086  | 0.11769 | 0.02494 | 1852 | 28 | 1827 | 28 | 1805 | 42 | 2249 | 451 |
| Lg-6-4-38 | 0.005 | 0.11436 | 0.00407 | 5.322   | 0.19759 | 0.33747 | 0.00935 | 0.08958 | 0.03648 | 1870 | 32 | 1872 | 32 | 1874 | 45 | 1734 | 677 |

---

|           |       |         |         |         |         |         |         |         |         |      |    |      |    |      |    |      |     |
|-----------|-------|---------|---------|---------|---------|---------|---------|---------|---------|------|----|------|----|------|----|------|-----|
| Lg-6-4-39 | 0.006 | 0.11334 | 0.00411 | 5.31041 | 0.20028 | 0.33977 | 0.00946 | 0.09779 | 0.03413 | 1854 | 32 | 1871 | 32 | 1886 | 46 | 1886 | 628 |
| Lg-6-4-40 | 0.008 | 0.11408 | 0.0042  | 5.24536 | 0.20041 | 0.33344 | 0.00933 | 0.09062 | 0.03033 | 1865 | 33 | 1860 | 33 | 1855 | 45 | 1753 | 562 |

---
