# Supplementary material for: Metamorphism and P-T Evolution of High-Pressure Granulites from the Fuping Complex, North China Craton
Source: MDPI journal article supplement (doi:10.3390/min14020138), 2024-01-26
Supplement: s1 [file s1]

## Supplementary Table 1

**Table S1.** Major (wt.%) elements compositions of the representative high-pressure granulites analyzed in the present study.

| Sample                                      | Lg-0-01           | Lg-0-2 | Lg-1-1 | Lg-1-2 | Lg-1-3                        | Lg-1-5 | Lg-1-6 | Lg-2-1 | Lg-6-1                                 | Lg-6-2 | Lg-6-04 |
|---------------------------------------------|-------------------|--------|--------|--------|-------------------------------|--------|--------|--------|----------------------------------------|--------|---------|
| Lithology                                   | garnet pyroxenite |        |        |        | garnet two-pyroxene granulite |        |        |        | garnet-bearing-plagioclase amphibolite |        |         |
| SiO <sub>2</sub>                            | 48.58             | 49.06  | 50.06  | 51.26  | 51.16                         | 48.68  | 52.30  | 50.00  | 52.42                                  | 51.42  | 51.31   |
| TiO <sub>2</sub>                            | 1.63              | 1.51   | 1.85   | 1.87   | 1.71                          | 1.44   | 1.83   | 1.46   | 1.44                                   | 1.48   | 1.38    |
| Al <sub>2</sub> O <sub>3</sub>              | 11.06             | 14.32  | 13.67  | 13.21  | 13.10                         | 14.00  | 12.59  | 13.77  | 13.13                                  | 13.03  | 12.80   |
| Fe <sub>2</sub> O <sub>3</sub> <sup>T</sup> | 19.31             | 16.25  | 17.72  | 17.16  | 11.54                         | 11.54  | 11.72  | 11.12  | 15.05                                  | 15.30  | 15.58   |
| FeO                                         | 11.44             | 11.54  | 13.01  | 12.38  | 16.59                         | 16.45  | 16.47  | 15.64  | 9.55                                   | 10.18  | 10.68   |
| MgO                                         | 6.25              | 4.91   | 5.24   | 4.98   | 0.23                          | 0.23   | 0.29   | 0.25   | 5.38                                   | 5.55   | 5.66    |
| MnO                                         | 0.22              | 0.27   | 0.24   | 0.24   | 5.70                          | 6.72   | 5.22   | 6.91   | 0.21                                   | 0.21   | 0.25    |
| CaO                                         | 9.07              | 11.45  | 9.23   | 9.97   | 8.55                          | 8.96   | 8.22   | 9.09   | 9.02                                   | 9.36   | 9.12    |
| Na <sub>2</sub> O                           | 2.21              | 2.12   | 1.32   | 1.60   | 1.27                          | 1.86   | 1.26   | 1.59   | 2.32                                   | 1.96   | 1.96    |
| K <sub>2</sub> O                            | 0.62              | 0.27   | 0.37   | 0.28   | 0.44                          | 0.53   | 0.38   | 0.67   | 0.72                                   | 0.79   | 0.76    |
| P <sub>2</sub> O <sub>5</sub>               | 0.38              | 0.29   | 0.24   | 0.26   | 0.27                          | 0.21   | 0.27   | 0.23   | 0.20                                   | 0.20   | 0.24    |
| LOI                                         | 0.27              | 0.14   | -0.03  | -0.22  | 0.62                          | 0.80   | 0.68   | 0.69   | 0.31                                   | 0.34   | 0.32    |
| Totall                                      | 100.66            | 101.29 | 100.62 | 101.07 | 101.18                        | 100.56 | 100.29 | 100.74 | 100.22                                 | 100.75 | 100.35  |
| X <sub>Mg</sub>                             | 27.88             | 25.07  | 24.39  | 24.19  | 27.74                         | 31.26  | 25.96  | 32.84  | 29.34                                  | 29.23  | 29.00   |
| K <sub>2</sub> O/Na <sub>2</sub> O          | 0.28              | 0.13   | 0.28   | 0.18   | 0.35                          | 0.28   | 0.30   | 0.42   | 0.31                                   | 0.40   | 0.39    |
| ISiO <sub>2</sub>                           | 44.01             | 43.92  | 44.41  | 45.38  | 46.27                         | 44.01  | 47.31  | 45.15  | 57.97                                  | 57.29  | 57.40   |
| IN+K                                        | 2.56              | 2.14   | 1.50   | 1.66   | 1.55                          | 2.16   | 1.48   | 2.04   | 3.36                                   | 3.06   | 3.04    |
