# Supplementary material for: Metamorphism and P-T Evolution of High-Pressure Granulites from the Fuping Complex, North China Craton
Source: MDPI journal article supplement (doi:10.3390/min14020138), 2024-01-26
Supplement: s1 [file s1]

## Supplementary Table 4

**Table S4.** Selected microprobe analyses for clinopyroxene of high-pressure granulites in this study.

| Lithology                      | garnet pyroxenite |                  |       |       |       |       |                  |       |       |       | garnet two-pyroxene granulite |                  |       |       |       |       |                  |       |       |       |       |     |
|--------------------------------|-------------------|------------------|-------|-------|-------|-------|------------------|-------|-------|-------|-------------------------------|------------------|-------|-------|-------|-------|------------------|-------|-------|-------|-------|-----|
|                                | Point             | Cpx <sub>1</sub> |       |       |       |       | Cpx <sub>2</sub> |       |       |       |                               | Cpx <sub>3</sub> |       |       |       |       | Cpx <sub>2</sub> |       |       |       |       | Opx |
| SiO <sub>2</sub>               | 50.56             | 51.03            | 52.31 | 50.97 | 50.47 | 50.77 | 50.52            | 51.58 | 51.85 | 52.58 | 52.02                         | 50.22            | 51.56 | 51.91 | 51.08 | 52.14 | 51.97            | 51.96 | 50.32 | 50.45 | 50.68 |     |
| TiO <sub>2</sub>               | 0.20              | 0.17             | 0.22  | 0.22  | 0.19  | 0.17  | 0.19             | 0.21  | 0.27  | 0.18  | 0.14                          | 0.23             | 0.15  | 0.17  | 0.24  | 0.13  | 0.08             | 0.14  | 0.07  | 0.04  | 0.01  |     |
| Al <sub>2</sub> O <sub>3</sub> | 1.76              | 1.93             | 1.88  | 1.81  | 2.08  | 1.74  | 1.67             | 1.93  | 1.99  | 1.65  | 1.81                          | 2.18             | 1.98  | 1.67  | 1.85  | 1.50  | 1.46             | 1.70  | 0.87  | 0.72  | 0.86  |     |
| Cr <sub>2</sub> O <sub>3</sub> | 0.02              | 0.02             | 0.00  | 0.02  | 0.02  | 0.01  | 0.00             | 0.02  | 0.04  | 0.02  | 0.02                          | 0.01             | 0.00  | 0.02  | 0.05  | 0.03  | 0.00             | 0.01  | 0.00  | 0.01  | 0.01  |     |
| FeO                            | 12.56             | 13.63            | 12.03 | 12.69 | 13.13 | 12.38 | 12.52            | 13.10 | 12.13 | 12.03 | 11.94                         | 10.79            | 10.99 | 10.64 | 11.62 | 13.01 | 12.74            | 13.35 | 31.86 | 32.31 | 32.15 |     |
| MnO                            | 0.17              | 0.12             | 0.14  | 0.15  | 0.12  | 0.12  | 0.13             | 0.06  | 0.16  | 0.14  | 0.13                          | 0.18             | 0.20  | 0.12  | 0.12  | 0.18  | 0.19             | 0.21  | 0.45  | 0.44  | 0.46  |     |
| MgO                            | 11.51             | 11.69            | 11.15 | 11.32 | 11.04 | 11.16 | 11.16            | 11.11 | 11.33 | 11.03 | 11.26                         | 12.27            | 12.35 | 12.00 | 11.79 | 11.39 | 11.49            | 11.53 | 15.10 | 15.20 | 15.37 |     |
| CaO                            | 21.07             | 20.02            | 21.24 | 21.33 | 20.86 | 21.27 | 21.42            | 20.08 | 20.72 | 20.63 | 21.07                         | 21.84            | 21.48 | 21.17 | 21.06 | 21.10 | 21.39            | 20.95 | 0.45  | 0.38  | 0.47  |     |
| Na <sub>2</sub> O              | 0.37              | 0.35             | 0.35  | 0.41  | 0.40  | 0.35  | 0.34             | 0.38  | 0.40  | 0.34  | 0.34                          | 0.40             | 0.38  | 0.34  | 0.32  | 0.31  | 0.31             | 0.33  | 0.00  | 0.01  | 0.00  |     |
| K <sub>2</sub> O               | 0.00              | 0.01             | 0.00  | 0.00  | 0.00  | 0.00  | 0.01             | 0.00  | 0.00  | 0.00  | 0.00                          | 0.01             | 0.00  | 0.00  | 0.02  | 0.00  | 0.01             | 0.00  | 0.01  | 0.00  | 0.01  |     |
| ZnO                            | 0.00              | 0.06             | 0.02  | 0.00  | 0.02  | 0.07  | 0.03             | 0.00  | 0.08  | 0.00  | 0.03                          | 0.05             | 0.02  | 0.00  | 0.00  | 0.00  | 0.00             | 0.00  | 0.00  | 0.00  | 0.00  |     |
| Si                             | 1.95              | 1.96             | 1.98  | 1.96  | 1.95  | 1.96  | 1.96             | 1.98  | 1.98  | 2.00  | 1.98                          | 1.93             | 1.96  | 1.98  | 1.96  | 1.98  | 1.98             | 1.97  | 1.98  | 1.98  | 1.98  |     |
| Al(IV)                         | 0.05              | 0.04             | 0.02  | 0.04  | 0.05  | 0.04  | 0.04             | 0.02  | 0.02  | 0.00  | 0.02                          | 0.07             | 0.04  | 0.02  | 0.04  | 0.02  | 0.02             | 0.03  | 0.02  | 0.02  | 0.02  |     |
| Al(VI)                         | 0.03              | 0.04             | 0.07  | 0.04  | 0.05  | 0.04  | 0.03             | 0.07  | 0.07  | 0.08  | 0.07                          | 0.03             | 0.05  | 0.06  | 0.05  | 0.05  | 0.04             | 0.04  | 0.02  | 0.02  | 0.02  |     |
| Ti                             | 0.01              | 0.00             | 0.01  | 0.01  | 0.01  | 0.01  | 0.01             | 0.01  | 0.01  | 0.01  | 0.00                          | 0.01             | 0.00  | 0.00  | 0.01  | 0.00  | 0.00             | 0.00  | 0.00  | 0.00  | 0.00  |     |
| Fe <sup>3+</sup>               | 0.04              | 0.02             | 0.00  | 0.04  | 0.03  | 0.01  | 0.03             | 0.00  | 0.00  | 0.00  | 0.00                          | 0.08             | 0.02  | 0.00  | 0.00  | 0.00  | 0.00             | 0.01  | 0.00  | 0.00  | 0.00  |     |
| Fe <sup>2+</sup>               | 0.36              | 0.41             | 0.38  | 0.37  | 0.39  | 0.39  | 0.37             | 0.42  | 0.39  | 0.39  | 0.38                          | 0.27             | 0.33  | 0.34  | 0.37  | 0.41  | 0.40             | 0.42  | 1.05  | 1.06  | 1.05  |     |
| Mn                             | 0.01              | 0.00             | 0.00  | 0.01  | 0.00  | 0.00  | 0.00             | 0.00  | 0.01  | 0.00  | 0.00                          | 0.01             | 0.01  | 0.00  | 0.00  | 0.01  | 0.01             | 0.01  | 0.01  | 0.01  | 0.02  |     |
| Mg                             | 0.66              | 0.67             | 0.63  | 0.65  | 0.64  | 0.64  | 0.64             | 0.64  | 0.64  | 0.63  | 0.64                          | 0.70             | 0.70  | 0.68  | 0.68  | 0.64  | 0.65             | 0.65  | 0.89  | 0.89  | 0.89  |     |
| Ca                             | 0.87              | 0.82             | 0.86  | 0.88  | 0.86  | 0.88  | 0.89             | 0.83  | 0.85  | 0.84  | 0.86                          | 0.90             | 0.87  | 0.87  | 0.87  | 0.86  | 0.87             | 0.85  | 0.02  | 0.02  | 0.02  |     |
| Na                             | 0.03              | 0.03             | 0.03  | 0.03  | 0.03  | 0.03  | 0.03             | 0.03  | 0.03  | 0.03  | 0.03                          | 0.03             | 0.03  | 0.02  | 0.02  | 0.02  | 0.02             | 0.02  | 0.00  | 0.00  | 0.00  |     |
| K                              | 0.00              | 0.00             | 0.00  | 0.00  | 0.00  | 0.00  | 0.00             | 0.00  | 0.00  | 0.00  | 0.00                          | 0.00             | 0.00  | 0.00  | 0.00  | 0.00  | 0.00             | 0.00  | 0.00  | 0.00  | 0.00  |     |
| Wo                             | 44.21             | 42.02            | 45.25 | 44.61 | 44.12 | 45.09 | 45.17            | 43.15 | 44.25 | 44.67 | 44.99                         | 45.36            | 44.69 | 45.14 | 44.60 | 44.12 | 44.53            | 43.48 | 0.97  | 0.81  | 0.99  |     |
| En                             | 33.61             | 34.15            | 33.06 | 32.93 | 32.51 | 32.91 | 32.76            | 33.22 | 33.66 | 33.24 | 33.48                         | 35.47            | 35.75 | 35.60 | 34.76 | 33.13 | 33.29            | 33.31 | 44.98 | 44.90 | 45.20 |     |
| Fs                             | 20.76             | 22.49            | 20.33 | 20.90 | 21.82 | 20.66 | 20.78            | 22.16 | 20.56 | 20.74 | 20.21                         | 17.66            | 18.14 | 17.97 | 19.42 | 21.57 | 21.00            | 21.96 | 54.05 | 54.27 | 53.81 |     |
| Ac                             | 1.42              | 1.34             | 1.36  | 1.57  | 1.55  | 1.34  | 1.30             | 1.46  | 1.53  | 1.34  | 1.33                          | 1.51             | 1.43  | 1.30  | 1.23  | 1.17  | 1.18             | 1.25  | 0.00  | 0.02  | 0.00  |     |
| X <sub>Mg</sub>                | 0.66              | 0.67             | 0.63  | 0.65  | 0.64  | 0.64  | 0.64             | 0.64  | 0.64  | 0.63  | 0.64                          | 0.70             | 0.70  | 0.68  | 0.68  | 0.61  | 0.62             | 0.61  | 0.46  | 0.46  | 0.46  |     |

---

Cpx<sub>1</sub>: Clinopyroxenes in “white eye” structure with amphibole reaction rim; Cpx<sub>2</sub>: Clinopyroxenes with amphibole inside; Cpx<sub>3</sub>: Clinopyroxene in the amphibole-core.
