# Supplementary material for: Metamorphism and P-T Evolution of High-Pressure Granulites from the Fuping Complex, North China Craton
Source: MDPI journal article supplement (doi:10.3390/min14020138), 2024-01-26
Supplement: s1 [file s1]

### Supplementary Table 5

**Table S5.** Selected microprobe analyses for amphibole of high-pressure granulites in this study.

| Lithology                      |                  | garnet pyroxenite  |       |       |       |       |                    |       |       |       |       |                  |       |       |       |
|--------------------------------|------------------|--------------------|-------|-------|-------|-------|--------------------|-------|-------|-------|-------|------------------|-------|-------|-------|
| Point                          | Amp <sub>1</sub> | Amp <sub>2-1</sub> |       |       |       |       | Amp <sub>2-2</sub> |       |       |       |       | Amp <sub>3</sub> |       |       |       |
| SiO <sub>2</sub>               | 36.33            | 42.05              | 41.57 | 42.21 | 42.07 | 40.83 | 39.39              | 40.71 | 42.12 | 40.90 | 40.51 | 42.13            | 40.15 | 40.62 | 40.22 |
| TiO <sub>2</sub>               | 3.18             | 2.45               | 2.42  | 2.53  | 2.36  | 2.42  | 2.39               | 2.37  | 2.37  | 2.37  | 2.36  | 2.29             | 2.25  | 2.38  | 2.15  |
| Al <sub>2</sub> O <sub>3</sub> | 16.49            | 11.87              | 11.70 | 11.86 | 11.74 | 11.79 | 12.06              | 11.60 | 11.60 | 11.70 | 11.62 | 11.41            | 11.53 | 11.09 | 11.65 |
| FeO                            | 17.74            | 18.76              | 18.61 | 18.83 | 18.16 | 18.72 | 18.71              | 19.15 | 18.68 | 18.73 | 18.79 | 18.64            | 18.80 | 18.53 | 18.69 |
| MnO                            | 0.03             | 0.07               | 0.06  | 0.09  | 0.06  | 0.11  | 0.08               | 0.09  | 0.04  | 0.06  | 0.08  | 0.08             | 0.02  | 0.09  | 0.07  |
| MgO                            | 6.93             | 8.28               | 8.21  | 8.20  | 8.45  | 8.23  | 8.33               | 8.19  | 8.37  | 8.42  | 8.34  | 8.52             | 8.38  | 8.67  | 8.55  |
| CaO                            | 11.28            | 10.68              | 10.92 | 10.98 | 11.06 | 10.96 | 11.11              | 11.09 | 10.91 | 10.86 | 10.98 | 11.14            | 11.14 | 11.24 | 11.08 |
| Na <sub>2</sub> O              | 1.17             | 1.30               | 1.33  | 1.35  | 1.23  | 1.31  | 1.40               | 1.20  | 1.30  | 1.30  | 1.30  | 1.29             | 1.24  | 1.22  | 1.38  |
| K <sub>2</sub> O               | 2.81             | 1.67               | 1.71  | 1.68  | 1.68  | 1.65  | 1.68               | 1.67  | 1.62  | 1.64  | 1.63  | 1.55             | 1.65  | 1.60  | 1.65  |
| Si                             | 5.67             | 6.36               | 6.36  | 6.37  | 6.40  | 6.28  | 6.13               | 6.27  | 6.39  | 6.27  | 6.26  | 6.39             | 6.24  | 6.29  | 6.22  |
| Al(IV)                         | 2.33             | 1.64               | 1.64  | 1.63  | 1.60  | 1.72  | 1.87               | 1.73  | 1.61  | 1.73  | 1.74  | 1.61             | 1.76  | 1.71  | 1.78  |
| Al(VI)                         | 0.70             | 0.47               | 0.46  | 0.48  | 0.50  | 0.41  | 0.34               | 0.37  | 0.46  | 0.39  | 0.37  | 0.43             | 0.35  | 0.31  | 0.35  |
| Ti                             | 0.37             | 0.28               | 0.28  | 0.29  | 0.27  | 0.28  | 0.28               | 0.27  | 0.27  | 0.27  | 0.27  | 0.26             | 0.26  | 0.28  | 0.25  |
| Fe <sup>3+</sup>               | 0.21             | 0.45               | 0.32  | 0.31  | 0.28  | 0.43  | 0.51               | 0.47  | 0.37  | 0.51  | 0.48  | 0.35             | 0.47  | 0.43  | 0.51  |
| Fe <sup>2+</sup>               | 2.10             | 1.92               | 2.06  | 2.07  | 2.03  | 1.98  | 1.92               | 1.99  | 2.00  | 1.89  | 1.94  | 2.02             | 1.97  | 1.97  | 1.91  |
| Mn                             | 0.00             | 0.01               | 0.01  | 0.01  | 0.01  | 0.01  | 0.01               | 0.01  | 0.01  | 0.01  | 0.01  | 0.01             | 0.00  | 0.01  | 0.01  |
| Mg                             | 1.61             | 1.87               | 1.87  | 1.85  | 1.91  | 1.89  | 1.93               | 1.88  | 1.89  | 1.93  | 1.92  | 1.93             | 1.94  | 2.00  | 1.97  |
| Ca                             | 1.88             | 1.73               | 1.79  | 1.78  | 1.80  | 1.81  | 1.85               | 1.83  | 1.77  | 1.79  | 1.82  | 1.81             | 1.86  | 1.86  | 1.84  |
| Na                             | 0.35             | 0.38               | 0.39  | 0.40  | 0.36  | 0.39  | 0.42               | 0.36  | 0.38  | 0.39  | 0.39  | 0.38             | 0.37  | 0.37  | 0.41  |
| K                              | 0.56             | 0.32               | 0.33  | 0.32  | 0.32  | 0.32  | 0.33               | 0.33  | 0.31  | 0.32  | 0.32  | 0.30             | 0.33  | 0.32  | 0.33  |
| (Na+K) <sub>A</sub>            | 0.80             | 0.43               | 0.52  | 0.50  | 0.49  | 0.52  | 0.61               | 0.51  | 0.47  | 0.49  | 0.53  | 0.49             | 0.56  | 0.55  | 0.57  |
| X <sub>Mg</sub>                | 0.43             | 0.49               | 0.48  | 0.47  | 0.48  | 0.49  | 0.50               | 0.49  | 0.49  | 0.50  | 0.50  | 0.49             | 0.50  | 0.50  | 0.51  |

Amp1: Amphibole inclusion in garnet-core; Amp2-1: Hypidiomorphic amphiboles together with plagioclase form the "white eyes" structure surround the garnet; Amp2-2: Hypidiomorphic amphiboles in the interior and sides of clinopyroxene; Amp3: Allotriomorphic amphiboles within the peak clinopyroxene.

| Lithology | garnet two-pyroxene granulite |                  | garnet-bearing-plagioclase amphibolite |
|-----------|-------------------------------|------------------|----------------------------------------|
| Point     | Amp <sub>1</sub>              | Amp <sub>2</sub> | In matrix                              |

|                                |       |       |       |       |       |       |       |       |       |       |       |       |       |       |       |       |       |                 |       |       |       |
|--------------------------------|-------|-------|-------|-------|-------|-------|-------|-------|-------|-------|-------|-------|-------|-------|-------|-------|-------|-----------------|-------|-------|-------|
| SiO <sub>2</sub>               | 42.31 | 42.04 | 39.88 | 41.26 | 41.28 | 42.00 | 40.65 | 40.33 | 40.48 | 40.22 | 41.05 | 41.76 | 44.44 | 51.11 | 52.93 | 40.47 | 40.03 | 39.82           | 40.82 | 41.39 | 40.95 |
| TiO <sub>2</sub>               | 1.78  | 1.83  | 2.06  | 1.60  | 2.08  | 1.88  | 1.93  | 2.41  | 2.36  | 2.15  | 1.83  | 1.79  | 1.10  | 0.04  | 0.09  | 2.12  | 2.23  | 1.88            | 1.75  | 1.50  | 1.96  |
| Al <sub>2</sub> O <sub>3</sub> | 11.64 | 11.72 | 12.55 | 12.44 | 11.85 | 11.42 | 11.39 | 11.54 | 11.58 | 11.65 | 11.57 | 11.28 | 9.00  | 3.17  | 2.22  | 12.17 | 12.77 | 12.59           | 11.93 | 12.11 | 11.93 |
| FeO                            | 16.72 | 16.94 | 17.69 | 18.09 | 18.00 | 17.95 | 18.43 | 18.79 | 18.46 | 18.69 | 18.26 | 17.90 | 16.08 | 14.07 | 14.68 | 19.38 | 19.94 | 19.57           | 17.83 | 17.57 | 17.79 |
| MnO                            | 0.15  | 0.08  | 0.14  | 0.11  | 0.18  | 0.18  | 0.18  | 0.09  | 0.07  | 0.07  | 0.12  | 0.13  | 0.14  | 0.23  | 0.26  | 0.11  | 0.12  | 0.10            | 0.32  | 0.31  | 0.27  |
| MgO                            | 9.97  | 9.61  | 9.38  | 9.21  | 8.93  | 9.10  | 9.09  | 8.38  | 8.68  | 8.55  | 9.24  | 9.53  | 10.77 | 14.24 | 13.77 | 8.74  | 8.20  | 8.36            | 9.37  | 9.36  | 9.14  |
| CaO                            | 11.14 | 11.11 | 11.07 | 11.02 | 10.90 | 11.10 | 11.21 | 10.98 | 11.07 | 11.08 | 11.04 | 11.09 | 12.37 | 12.10 | 12.10 | 11.14 | 10.89 | 11.09           | 10.95 | 10.95 | 10.97 |
| Na <sub>2</sub> O              | 1.43  | 1.46  | 1.56  | 1.50  | 1.49  | 1.42  | 1.42  | 1.27  | 1.27  | 1.38  | 1.45  | 1.47  | 1.02  | 0.28  | 0.20  | 1.51  | 1.42  | 1.36            | 1.54  | 1.48  | 1.60  |
| K <sub>2</sub> O               | 1.04  | 1.01  | 1.17  | 1.12  | 1.10  | 1.07  | 1.06  | 1.58  | 1.64  | 1.65  | 1.02  | 1.03  | 0.69  | 0.05  | 0.04  | 1.81  | 1.83  | 1.82            | 1.13  | 1.14  | 1.19  |
| Si                             | 6.37  | 6.37  | 6.09  | 6.23  | 6.29  | 6.38  | 6.24  | 6.24  | 6.24  | 6.22  | 6.26  | 6.34  | 6.76  | 7.55  | 7.76  | 6.327 | 6.335 | 6.305           | 6.22  | 6.28  | 6.25  |
| Al(IV)                         | 1.63  | 1.63  | 1.91  | 1.77  | 1.71  | 1.62  | 1.76  | 1.76  | 1.76  | 1.78  | 1.74  | 1.66  | 1.24  | 0.45  | 0.24  | 1.673 | 1.665 | 1.695           | 1.78  | 1.72  | 1.75  |
| Al(VI)                         | 0.44  | 0.46  | 0.35  | 0.45  | 0.42  | 0.42  | 0.30  | 0.34  | 0.34  | 0.35  | 0.34  | 0.35  | 0.37  | 0.10  | 0.15  | 0.436 | 0.431 | 0.399           | 0.36  | 0.44  | 0.39  |
| Ti                             | 0.20  | 0.21  | 0.24  | 0.18  | 0.24  | 0.22  | 0.22  | 0.28  | 0.27  | 0.25  | 0.21  | 0.20  | 0.13  | 0.00  | 0.01  | 0.246 | 0.234 | 0.265           | 0.20  | 0.17  | 0.23  |
| Fe <sup>3+</sup>               | 0.58  | 0.52  | 0.77  | 0.74  | 0.60  | 0.53  | 0.69  | 0.52  | 0.51  | 0.51  | 0.74  | 0.66  | 0.16  | 0.43  | 0.21  | 0.000 | 0.017 | 0.000           | 0.77  | 0.72  | 0.62  |
| Fe <sup>2+</sup>               | 1.53  | 1.63  | 1.49  | 1.54  | 1.69  | 1.75  | 1.68  | 1.91  | 1.87  | 1.91  | 1.59  | 1.61  | 1.89  | 1.31  | 1.59  | 2.566 | 2.541 | 2.552           | 1.50  | 1.51  | 1.65  |
| Mn                             | 0.02  | 0.01  | 0.02  | 0.01  | 0.02  | 0.02  | 0.02  | 0.01  | 0.01  | 0.01  | 0.01  | 0.02  | 0.02  | 0.03  | 0.03  | 0.011 | 0.016 | 0.014           | 0.04  | 0.04  | 0.04  |
| Mg                             | 2.24  | 2.17  | 2.14  | 2.07  | 2.03  | 2.06  | 2.08  | 1.93  | 1.99  | 1.97  | 2.10  | 2.16  | 2.44  | 3.13  | 3.01  | 1.897 | 1.910 | 1.919           | 2.13  | 2.12  | 2.08  |
| Ca                             | 1.80  | 1.80  | 1.81  | 1.78  | 1.78  | 1.81  | 1.84  | 1.82  | 1.83  | 1.84  | 1.80  | 1.80  | 2.01  | 1.91  | 1.90  | 1.833 | 1.848 | 1.832           | 1.79  | 1.78  | 1.79  |
| Na                             | 0.42  | 0.43  | 0.46  | 0.44  | 0.44  | 0.42  | 0.42  | 0.38  | 0.38  | 0.41  | 0.43  | 0.43  | 0.30  | 0.08  | 0.06  | 0.411 | 0.407 | 0.420           | 0.46  | 0.44  | 0.47  |
| K                              | 0.20  | 0.20  | 0.23  | 0.21  | 0.21  | 0.21  | 0.21  | 0.31  | 0.32  | 0.33  | 0.20  | 0.20  | 0.13  | 0.01  | 0.01  | 0.341 | 0.338 | 0.368           | 0.22  | 0.22  | 0.23  |
| (Na+K) <sub>A</sub>            | 0.41  | 0.43  | 0.50  | 0.44  | 0.43  | 0.43  | 0.47  | 0.51  | 0.53  | 0.57  | 0.43  | 0.44  | 0.45  | 0.01  | 0.01  | 0.752 | 0.745 | 0.7877<br>88016 | 0.46  | 0.43  | 0.50  |
| X <sub>Mg</sub>                | 0.59  | 0.57  | 0.59  | 0.57  | 0.55  | 0.54  | 0.55  | 0.50  | 0.52  | 0.51  | 0.57  | 0.57  | 0.56  | 0.71  | 0.65  | 0.425 | 0.429 | 0.429           | 0.59  | 0.58  | 0.56  |

Amp1: Hypidiomorphic amphiboles with larger size located in the matrix as well as form the "white eye" structure around the garnet; Amp2: Allotri-  
omorphous granoblastic amphibole with relict clinopyroxene inside.
